# Supplementary material
Source: PubMed Central journal article supplement (PMC7297516)
Supplement: NIHMS1592353-supplement-3.pdf [file NIHMS1592353-supplement-3.pdf]

**Supplemental Table 1: qPCR Primer Sequences**

| <b>Species</b> | <b>Gene</b> | <b>Forward Primer Sequence</b> | <b>Reverse Primer Sequence</b> |
|----------------|-------------|--------------------------------|--------------------------------|
| Human          | b-Actin     | CAGTGCCTAGGTCACCCACT           | AGAAGTCGCAGGACCACACT           |
| Human          | IGF1R       | AGTTATCTCCGGTCTCTGAGG          | TCTGTGGACGAACCTATTGGC          |
| Human          | p65         | AGCTTGTAGGAAAGGACTGC           | TGTTGTTGGTCTGGATGCG            |
| Human          | Snail       | CACTATGCCGCGCTCTTTC            | GGTCGTAGGGCTGCTGGAA            |
| Human          | Slug        | AGCATTTCAACGCCTCCA             | GGATCTCTGGTTGTGGTATGAC         |
| Mouse          | p63deltaN   | CCTGGAAAACAATGCCCAGAC          | GAGGAGCCGTTCTGAATCTGC          |
| Mouse          | c-Kit       | GCCACGTCTCAGCCATCTG            | GTCGCCAGCTTCAACTATTAACT        |
| Mouse          | Elf5        | ATGTTGGACTCCGTAACCCAT          | GCAGGGTAGTAGTCTTCATTGCT        |
| Mouse          | Cxcr4       | GAAGTGGGGTCTGGAGACTAT          | TTGCCGACTATGCCAGTCAAG          |
| Mouse          | LBP         | CCTGAGACTCGCCATCTCTGA          | AGGAGGAGGTCCACTGAAATG          |
| Mouse          | Sox10       | CCCACACTACACCGACCAG            | GGCCATAATAGGGTCCTGAGG          |
| Mouse          | ID4         | CAGTGCGATATGAACGACTGC          | GACTTTCTTGTTGGGCGGGAT          |
| Mouse          | Egr2        | GCCAAGGCCGTAGACAAAATC          | CCACTCCGTTTCATCTGGTCA          |
| Mouse          | Mef2C       | TGCTGGTCTCACCTGGTAAC           | ATCCTTTGATTCACTGATGGCAT        |
| Mouse          | Twist2      | CGCTACAGCAAGAAATCGAGC          | GCTGAGCTTGTCAGAGGGG            |
| Mouse          | Tbx2        | CCGATGACTGCCGCTATAAGT          | CCATCCACTGTTCCCCTGT            |

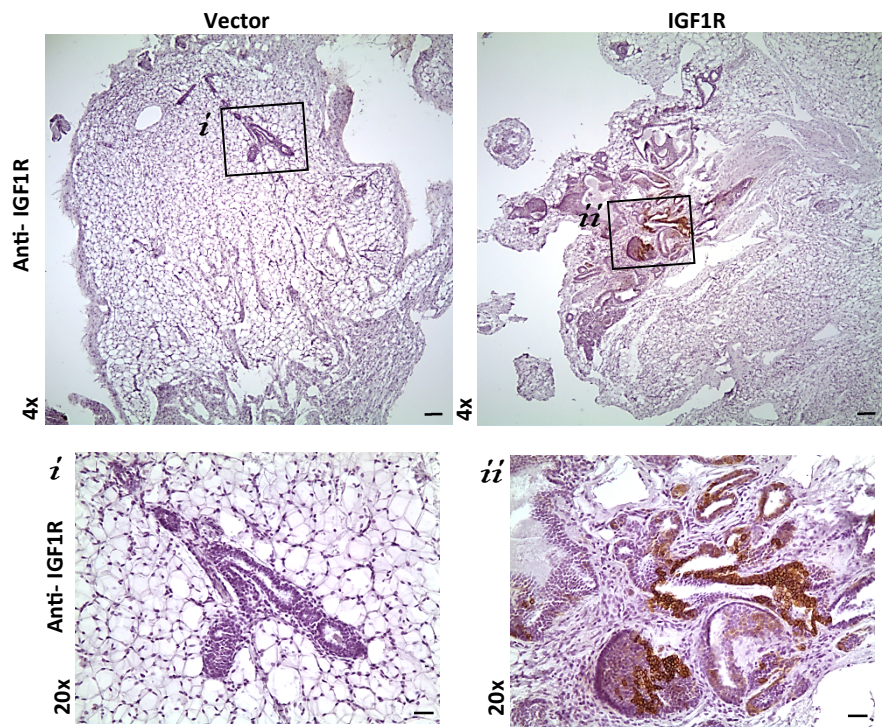

**Supplemental Figure 1: IGF1R-infected primary mouse MEC gland reconstitutions demonstrate regional IGF1R expression.** A) IHC of CD8-IGF1R-reconstituted glands with anti-IGF1R; 4x with 20x inserts.

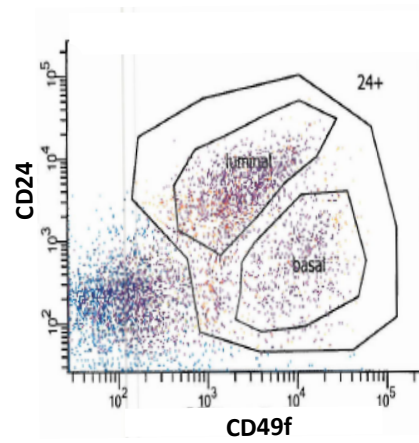

**Supplemental Figure 2: FACS populations of lineage-specific sort.** Wild type mammary glands were dissociated, and FACS analyzed for CD24, CD49f, CD29, and CD61 markers to separate the luminal and basal populations.

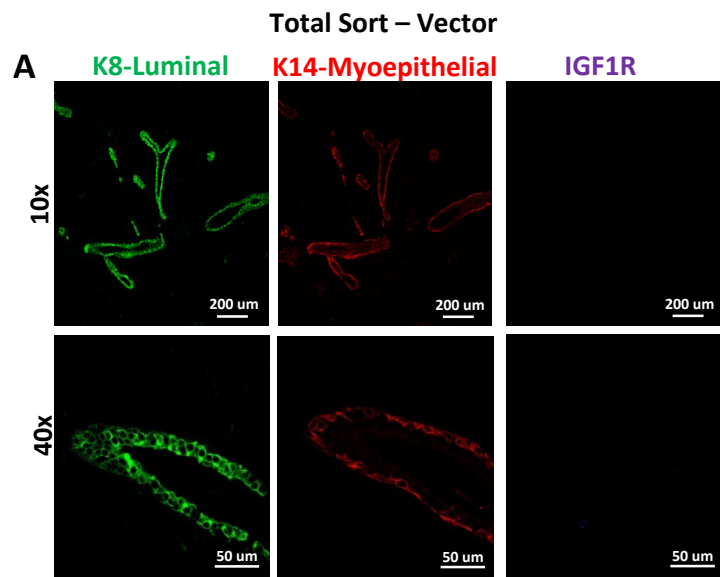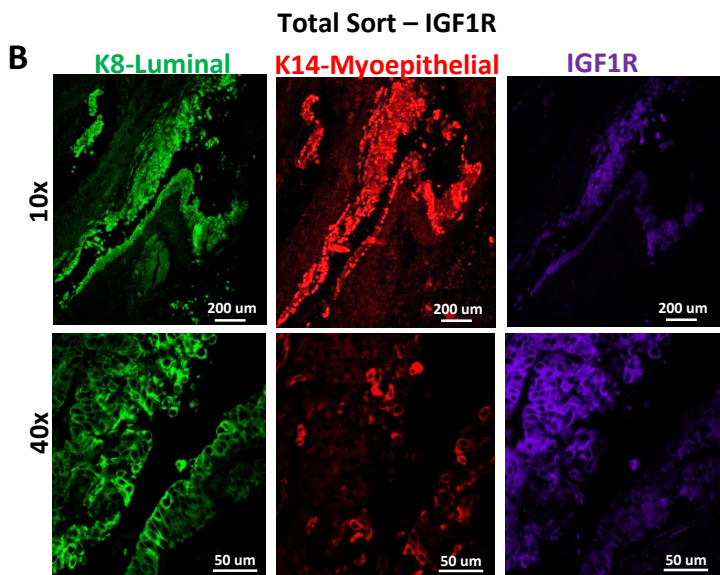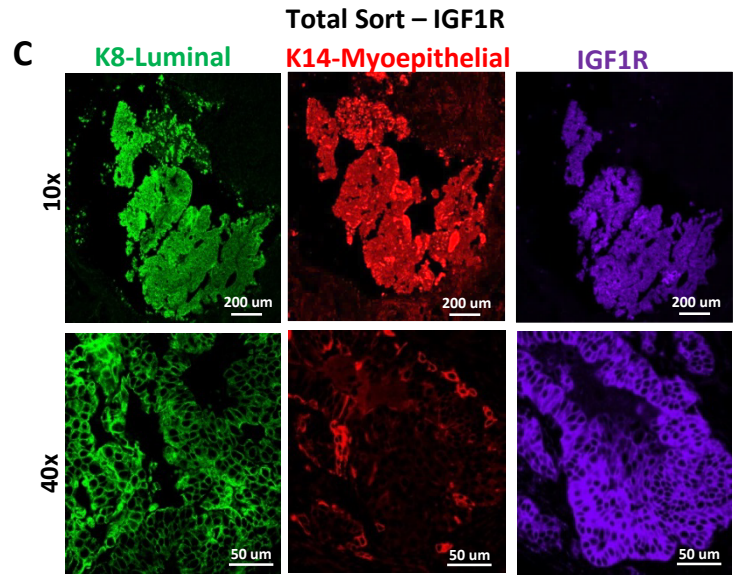

**Supplemental Figure 3: Total-sorted controls of IGF1R-infected primary mouse MECs have similar lineage markers as observed in total un-sorted reconstitutions and transgenic mice. IF of glands from total population sorted cells infected with A) vector control or B-C) CD8-IGF1R co-stained with K8 (green), K14 (red), and IGF1R (purple); 10x with 40x insets.**

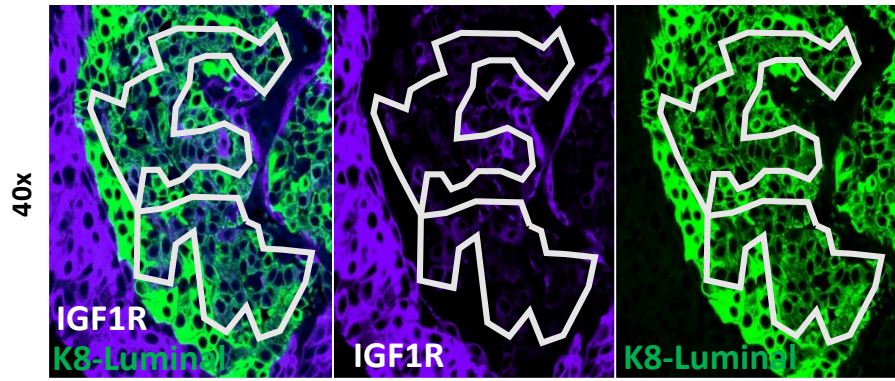

**Supplemental Figure 4: Luminal-sorted IGF1R-infected primary mouse MECs have differential co-expression of IGF1R with K8 lineage marker in reconstituted glands.** IF of glands reconstituted with luminal-sorted MECs infected with CD8-IGF1R. Sections are co-stained with K8 (green) or IGF1R (purple); 40x. Circled sections highlight areas of high IGF1R expression and minimal to no lineage marker expression.
